# Supplementary material for: GSK3 inhibition circumvents and overcomes acquired lorlatinib resistance in ALK-rearranged non-small-cell lung cancer
Source: PubMed Central journal article supplement (PMC8931094; doi:10.1038/s41698-022-00260-0), 2022-03-17
Supplement: 41698_2022_260_MOESM3_ESM.pdf [file 41698_2022_260_MOESM3_ESM.pdf]

## Reporting Summary

Nature Portfolio wishes to improve the reproducibility of the work that we publish. This form provides structure for consistency and transparency in reporting. For further information on Nature Portfolio policies, see our [Editorial Policies](#) and the [Editorial Policy Checklist](#).

### Statistics

For all statistical analyses, confirm that the following items are present in the figure legend, table legend, main text, or Methods section.

n/a Confirmed

- |                                     |                                     |                                                                                                                                                                                                                                                            |
|-------------------------------------|-------------------------------------|------------------------------------------------------------------------------------------------------------------------------------------------------------------------------------------------------------------------------------------------------------|
| <input type="checkbox"/>            | <input checked="" type="checkbox"/> | The exact sample size ( $n$ ) for each experimental group/condition, given as a discrete number and unit of measurement                                                                                                                                    |
| <input type="checkbox"/>            | <input checked="" type="checkbox"/> | A statement on whether measurements were taken from distinct samples or whether the same sample was measured repeatedly                                                                                                                                    |
| <input type="checkbox"/>            | <input checked="" type="checkbox"/> | The statistical test(s) used AND whether they are one- or two-sided<br><i>Only common tests should be described solely by name; describe more complex techniques in the Methods section.</i>                                                               |
| <input checked="" type="checkbox"/> | <input type="checkbox"/>            | A description of all covariates tested                                                                                                                                                                                                                     |
| <input type="checkbox"/>            | <input checked="" type="checkbox"/> | A description of any assumptions or corrections, such as tests of normality and adjustment for multiple comparisons                                                                                                                                        |
| <input type="checkbox"/>            | <input checked="" type="checkbox"/> | A full description of the statistical parameters including central tendency (e.g. means) or other basic estimates (e.g. regression coefficient) AND variation (e.g. standard deviation) or associated estimates of uncertainty (e.g. confidence intervals) |
| <input type="checkbox"/>            | <input checked="" type="checkbox"/> | For null hypothesis testing, the test statistic (e.g. $F$ , $t$ , $r$ ) with confidence intervals, effect sizes, degrees of freedom and $P$ value noted<br><i>Give <math>P</math> values as exact values whenever suitable.</i>                            |
| <input checked="" type="checkbox"/> | <input type="checkbox"/>            | For Bayesian analysis, information on the choice of priors and Markov chain Monte Carlo settings                                                                                                                                                           |
| <input checked="" type="checkbox"/> | <input type="checkbox"/>            | For hierarchical and complex designs, identification of the appropriate level for tests and full reporting of outcomes                                                                                                                                     |
| <input checked="" type="checkbox"/> | <input type="checkbox"/>            | Estimates of effect sizes (e.g. Cohen's $d$ , Pearson's $r$ ), indicating how they were calculated                                                                                                                                                         |

*Our web collection on [statistics for biologists](#) contains articles on many of the points above.*

### Software and code

Policy information about [availability of computer code](#)

Data collection No software was used.

Data analysis GraphPad Prism version 9.1.2 and R version 4.0.2 were used to analyze and graphically display the data. FlowJo software was used to analyze and graphically display the data in apoptosis assay. SynergyFinder 2.0 web application tool was used for analyzing synergistic effect of drug combination. ImageJ was used to quantify the band intensity. Information for Proteomics analysis was described in the Supplementary methods and figure legends. QuantaSoft Analysis Pro Software was used for analyzing the expression of genes in droplet digital PCR.

For manuscripts utilizing custom algorithms or software that are central to the research but not yet described in published literature, software must be made available to editors and reviewers. We strongly encourage code deposition in a community repository (e.g. GitHub). See the Nature Portfolio [guidelines for submitting code & software](#) for further information.

### Data

Policy information about [availability of data](#)

All manuscripts must include a [data availability statement](#). This statement should provide the following information, where applicable:

- Accession codes, unique identifiers, or web links for publicly available datasets
- A description of any restrictions on data availability
- For clinical datasets or third party data, please ensure that the statement adheres to our [policy](#)

The data that support the findings of this study are available from the corresponding author upon reasonable request.

## Field-specific reporting

Please select the one below that is the best fit for your research. If you are not sure, read the appropriate sections before making your selection.

Life sciences  Behavioural & social sciences  Ecological, evolutionary & environmental sciences

For a reference copy of the document with all sections, see [nature.com/documents/nr-reporting-summary-flat.pdf](https://www.nature.com/documents/nr-reporting-summary-flat.pdf)

## Life sciences study design

All studies must disclose on these points even when the disclosure is negative.

|                 |                                                                                                                                                          |
|-----------------|----------------------------------------------------------------------------------------------------------------------------------------------------------|
| Sample size     | Sample size of at least three was used in most experiment for statistical analysis. For the drug screening assay, we performed it by sample size of two. |
| Data exclusions | No data were excluded.                                                                                                                                   |
| Replication     | We repeated in vitro experiment at least 2 times, and confirmed the reproducibility of the data.                                                         |
| Randomization   | No method of randomization was used for in vitro experiments.                                                                                            |
| Blinding        | All experiments were not performed blind due to feasibility.                                                                                             |

## Reporting for specific materials, systems and methods

We require information from authors about some types of materials, experimental systems and methods used in many studies. Here, indicate whether each material, system or method listed is relevant to your study. If you are not sure if a list item applies to your research, read the appropriate section before selecting a response.

### Materials & experimental systems

|                                     |                                                           |
|-------------------------------------|-----------------------------------------------------------|
| n/a                                 | Involved in the study                                     |
| <input type="checkbox"/>            | <input checked="" type="checkbox"/> Antibodies            |
| <input type="checkbox"/>            | <input checked="" type="checkbox"/> Eukaryotic cell lines |
| <input checked="" type="checkbox"/> | <input type="checkbox"/> Palaeontology and archaeology    |
| <input checked="" type="checkbox"/> | <input type="checkbox"/> Animals and other organisms      |
| <input checked="" type="checkbox"/> | <input type="checkbox"/> Human research participants      |
| <input checked="" type="checkbox"/> | <input type="checkbox"/> Clinical data                    |
| <input checked="" type="checkbox"/> | <input type="checkbox"/> Dual use research of concern     |

### Methods

|                                     |                                                    |
|-------------------------------------|----------------------------------------------------|
| n/a                                 | Involved in the study                              |
| <input checked="" type="checkbox"/> | <input type="checkbox"/> ChIP-seq                  |
| <input type="checkbox"/>            | <input checked="" type="checkbox"/> Flow cytometry |
| <input checked="" type="checkbox"/> | <input type="checkbox"/> MRI-based neuroimaging    |

## Antibodies

Antibodies used

The following antibodies were purchased from Cell Signaling Technology: total ALK (#3633), phospho-ALK (Y1604, #3341), total AKT (#4691), phospho-AKT (S473, #4060), total p42/44 ERK/MAPK (#9102), phospho-p42/44 ERK/MAPK (T202/Y204, #9101), total GSK3 $\alpha$  (#4337), total GSK3 $\beta$  (#12456), phospho-GSK3 $\alpha/\beta$  (S21/S9, #8566), total Glycogen Synthase (GS) (#3893), phospho-Glycogen Synthase (S641, #3891), total Src (#2123), phospho-Src (Y416, #6943), total  $\beta$ -catenin (#8480), phospho- $\beta$ -catenin (S33/37/T41, #9561), total S6 ribosomal protein (#2217), phospho-S6 ribosomal protein (S240/244, #5364), poly(ADP-ribose) polymerase (PARP) (#9542), and cleaved PARP (#9541), E-cadherin (#3195), N-cadherin (#13116), and Vimentin (#5741). In addition, phospho-GSK3 $\alpha/\beta$  (Y279/Y216) antibody was purchased from Abcam, and glyceraldehyde 3-phosphate dehydrogenase (GAPDH) antibody was purchased from Millipore.

Validation

All antibodies are commercially available and have been validated by the companies.

## Eukaryotic cell lines

Policy information about [cell lines](#)

Cell line source(s)

H3122 cell line was kindly gifted by Dr. Engelman JA. JFCR-018-1, JFCR-028-3, JFCR-028-4, JFCR-028-5, JFCR-093-3, JFCR-198-2, JFCR-278, MCC-003, DU-LAD-002 cells were established from ALK-positive patient-derived NSCLC patients.

Authentication

Public available cell lines were authenticated. H3122 cell line was authenticated by applying short tandem-repeat (STR) DNA profiling analysis. Patient-derived cell lines were confirmed by the sequencing of driver oncogenes.

Mycoplasma contamination

All public cell lines were not detected mycoplasma by the PCR based assay kit. Patient-derived cell lines were not tested for mycoplasma contamination.

Commonly misidentified lines  
(See [ICLAC](#) register)

No commonly misidentified cell lines were not used in this study.

## Flow Cytometry

### Plots

Confirm that:

- The axis labels state the marker and fluorochrome used (e.g. CD4-FITC).
- The axis scales are clearly visible. Include numbers along axes only for bottom left plot of group (a 'group' is an analysis of identical markers).
- All plots are contour plots with outliers or pseudocolor plots.
- A numerical value for number of cells or percentage (with statistics) is provided.

### Methodology

Sample preparation

Cells were seeded at a density of  $1 \times 10^5$  cells/well in 6-well plates. After overnight culture, cells were treated with the indicated concentration of drugs. All floating and adherent cells were collected after 72 h of drug treatment. Cells were stained with propidium iodide and Alexa Fluor 647 conjugated annexin V using a Annexin V / Dead Cell Apoptosis Kit (Thermo Fischer Scientific) for 15 min at room temperature.

Instrument

FACS Lyric

Software

FlowJo

Cell population abundance

More than 10,000 cells were counted for the apoptosis assay.

Gating strategy

We used only FSC and SSC for gating strategy.

- Tick this box to confirm that a figure exemplifying the gating strategy is provided in the Supplementary Information.
